1                   **Suspensor-derived somatic embryogenesis in Arabidopsis**

2

3                   Tatyana Radoeva\*, Catherine Albrecht\*, Marcel Piepers, Sacco de Vries#

4                                                           and Dolf Weijers#

5

6                   Wageningen University, Laboratory of Biochemistry, Stippeneng 4, 6708 WE

7                   Wageningen, The Netherlands

8

9                   \* These authors contributed equally

10

11                   # Corresponding authors: [sacco.devries@wur.nl](mailto:sacco.devries@wur.nl) and [dolf.weijers@wur.nl](mailto:dolf.weijers@wur.nl)

12

13

14 **Abstract**

15

16 In many flowering plants, including *Arabidopsis thaliana*, asymmetric division of  
17 the zygote generates apical and basal cells with different fates. The apical cell  
18 continues to produce the embryo while the basal cell undergoes a restricted  
19 number of anticlinal divisions leading to a suspensor of 6-9 quiescent cells that  
20 remain extra-embryonic and eventually senesce. In some genetic backgrounds,  
21 or upon ablation of the embryo, suspensor cells can however undergo periclinal  
22 cell divisions and eventually form a second, twin seedling. Likewise,  
23 embryogenesis can be induced from somatic cells by various genes, but the  
24 relation to suspensor-derived embryos is unclear. Here, we addressed the nature  
25 of the suspensor to embryo fate transformation, and its genetic triggers. We  
26 expressed most known embryogenesis-inducing transcriptional regulators and  
27 receptor-like kinases specifically in suspensor cells. Among these, only RKD1 and  
28 WUS could induce a heritable twin seedling phenotype. We next analyzed  
29 morphology and fate marker expression in embryos in which suspensor division  
30 were activated by different triggers to address the developmental paths towards  
31 reprogramming. Our results show that reprogramming of Arabidopsis suspensor  
32 cells towards embryonic identity is a specific cellular response that is triggered  
33 by defined regulators, follows a conserved developmental trajectory and shares  
34 similarity to the process of somatic embryogenesis from post-embryonic tissues.

35

36

37

## 38 Introduction

39

40 In flowering plants (Angiosperms), embryogenesis is initiated by fertilization of  
41 the egg cell. In Arabidopsis, this gives rise to the zygote that undergoes an  
42 asymmetric division to form two cells with distinct fate: an apical embryonic cell  
43 and a basal extra-embryonic cell from which the suspensor develops. The apical  
44 cell then continues to divide in a strictly regular manner to give rise to most  
45 tissues and cell types of the seedling plant (Palovaara et al., 2016). Of the  
46 approximately 7 suspensor cells, only the uppermost, the hypophysis,  
47 contributes to generating the root meristem. The common view is that the  
48 suspensor cells supply the growing embryo with nutrients and growth  
49 regulators, fix the developing embryo to the micropylar cavity within the seed  
50 and may function as a reservoir of embryogenic cells in case the primary embryo  
51 fails (Kawashima and Goldberg, 2010; Radoeva and Weijers, 2014). Despite its  
52 quiescence under normal conditions, secondary embryos can be formed from  
53 suspensor cells in many plant species under specific conditions (Lakshmanan  
54 and Ambegaokar, 1984). Suspensor-derived embryogenesis can be  
55 experimentally induced by stress treatments (Haccius, 1955) or by impairment  
56 of the primary embryo through radiation (Haccius, 1955), mutations (such as *sus*  
57 and *twn*; Schwartz et al., 1994; Vernon and Meinke, 1994), genetic ablation  
58 (Weijers et al., 2003), by expression of the auxin response inhibitor protein  
59 *bodenlos* (*bdl*; Rademacher et al., 2012) or by laser irradiation (Gooh et al.,  
60 2015; Liu et al., 2015). Thus, suspensor cells can be regarded as a dormant pool  
61 of stem cells, which can switch to embryo identity in need. Re-initiation of  
62 embryonic cell fate in suspensor cells has the advantage that a precise sequence  
63 of reprogramming, the possible occurrence of cell autonomy and lateral  
64 inhibition as well as stochastic and epigenetic aspects can be analyzed in a  
65 predictable fashion in only a few cells of a genetically superior system (Radoeva  
66 and Weijers, 2014; de Vries and Weijers, 2017).

67 The ability of plant cells to be reprogrammed towards embryogenesis has  
68 long been recognized and has been the basis for protocols of somatic  
69 embryogenesis (Egertsdotter et al., 2019). In the past decades, several factors  
70 have been identified that can facilitate or trigger the induction of somatic

71 embryos. Genes like the leucine-rich repeat receptor-like kinase (LRR-RLK)  
72 SOMATIC EMBRYOGENESIS RECEPTOR-LIKE KINASE 1 (SERK1) appear to affect  
73 the competence to form somatic embryos (Hecht et al., 2001), while  
74 transcriptional regulators of the BABY BOOM (BBM) and LEAFY COTYLEDON  
75 (LEC) pathway appear to directly induce somatic embryos (Horstman et al.,  
76 2017). In addition, genes from the plant-specific RWP-RK domain-containing  
77 (RKD) family, involved in maintaining egg cell identity, are able to induce loss of  
78 cell identity (Köszegi et al., 2011) or actively promote somatic embryogenesis  
79 (Waki et al., 2011) upon ectopic expression. However, these genes were  
80 identified and tested in different experimental systems, ranging from Brassica  
81 microspores to Arabidopsis meristems and seedlings. This makes it challenging  
82 to infer whether these factors are part of the same genetic network or pathway,  
83 and it is unclear how these factors, or the process of somatic embryogenesis,  
84 relates to the reprogramming of suspensor cells.

85         Here, we have exploited the simple, predictable suspensor system to  
86 address these questions. We have first tested the ability of 16 different genes,  
87 representative of the somatic embryo pathways, to induce suspensor-derived  
88 twin seedlings. We next compared suspensor-derived embryogenesis induced by  
89 three different triggers to define the developmental trajectory underlying  
90 reprogramming. We found that a common sequence of events underlies  
91 reprogramming. First, suspensor identity is lost, closely connected with  
92 activation of cell division. Embryo identity is only gained later, either  
93 concomitant with or following the activation of division. Our work shows that  
94 suspensor reprogramming is activated by specific triggers, but also reveals a  
95 striking similarity between suspensor-derived and other somatic embryogenesis  
96 processes.

97

98

99

100 **Results**

101

102 *Suspensor embryogenesis requires specific genetic triggers*

103

104 Several genes have previously been reported to trigger embryogenesis when  
105 ectopically overexpressed and have therefore been defined as master embryonic  
106 or meristematic regulators (reviewed in Ikeuchi et al., 2013; Radoeva and  
107 Weijers, 2014). Nevertheless, their ability to induce embryogenesis has been  
108 tested in diverse model systems (Boutilier et al., 2002; Hecht et al., 2001; Waki et  
109 al., 2011; Zuo et al., 2002). It is therefore difficult to compare their activities and  
110 to address if all indeed trigger embryo identity or some other process  
111 contributing to the development of somatic embryos. We decided to use the  
112 predictable suspensor-derived embryogenesis as an experimental system to test  
113 known embryo inducers for their ability to convert suspensor cells into  
114 secondary twin embryos and ultimately into twin seedlings.

115 We selected sixteen genes to test for their ability to promote embryo  
116 initiation. These include transcriptional regulators such as LEC, BBM, AGL15,  
117 RKD, WUS and WOX, and the receptor-like kinase SERK1 (Table S1). Each was  
118 misexpressed in the developing suspensor using a two-component GAL4/UAS  
119 system from the M0171-GAL4 driver line (Rademacher et al., 2012; Radoeva et  
120 al., 2016). This same approach previously led to excessive suspensor cell  
121 divisions when the *bdl/iaa12* protein was expressed (Rademacher et al., 2012).  
122 However, twin seedlings resulting from ubiquitous *bdl* overexpression were only  
123 seen in *RPS5A>>bdl* embryos (Rademacher et al., 2012). While excessively  
124 dividing cells in *M0171>>bdl* suspensors did at times resemble embryo-like  
125 structures, twin seedlings were not observed in these embryos (Radoeva et al.,  
126 2019).

127 After transforming transgenes driving each embryogenesis regulator  
128 from the GAL4-dependent *UAS* promoter into the M0171 GAL4 driver line, we  
129 screened primary transformants for twin seedlings, a phenotype that is not  
130 found in wild-type (0%; n>500). This is the most stringent selection criterium  
131 for suspensor-derived embryos, given that it not only requires initiation and  
132 formation of a second embryo, but also maturation and survival of desiccation,

133 dormancy and germination. Strikingly, while many of these genes had been  
134 shown to promote embryogenesis in various conditions, only few could induce  
135 twin seedling development in this assay. Only WUS, RKD1 and RKD4 expression  
136 led to the recovery of twin seedlings (Fig. 20; Table S1). The efficiency among  
137 these genes was very different: 29% (n=17) of RKD1-expressing transgenics  
138 showed twins, in contrast to 3% (n=30) of WUS-expressing and 2% (n=54) of  
139 RKD4 expression lines (Table S1). RKD4 resulted in distorted seedlings that did  
140 not develop into viable fertile plants (Table S1). The failure to observe twin  
141 seedlings with any of the other embryo-promoting genes was not due to the  
142 construct used. For example, M0171>>BBM-expressing plants showed  
143 morphological distortions at later stage (Table S1), but did not show twin  
144 seedlings, twin embryos or periclinal suspensor divisions (data not shown). The  
145 RKD1 and WUS-induced twinning was heritable, but phenotypic penetrance was  
146 highly variable among RKD1 lines (Table S2).

147 To determine whether the occurrence of additional, periclinal cell  
148 divisions in the suspensor cells coincided with viable twin embryos and  
149 seedlings in the same lines we compared phenotype penetrance at different  
150 stages. While in 35 % of M0171>>RKD1 embryos (n=366), periclinal suspensor  
151 divisions could be observed, only 9% of the viable progeny seedlings were twins  
152 (n=1590; Figure 1). Thus, less than one third of the embryos that showed  
153 periclinal divisions indeed developed twin embryos. This number is close to  
154 what is observed in the *twin1* mutant where 25% of the embryos (n=234)  
155 showed periclinal suspensor divisions leading to only 13% of viable seedling  
156 twins. The reduced phenotypic penetrance could mean that not all embryo-like  
157 structures have embryo identity, but given the delay between suspensor-derived  
158 and primary embryo development, it is also possible that spatial constraints or a  
159 failure to execute maturation or desiccation programs cause this difference.

160 Thus, at least three transcription factors can induce complete, viable  
161 suspensor-derived twin seedlings. Yet, most of the genes tested could not,  
162 suggesting that the fate switch in suspensor cells from extra-embryonic to  
163 embryonic identity is a specific response that is triggered by a defined set of  
164 regulators.

165

166 *Diverse cell division patterns can mediate suspensor-derived embryogenesis*

167

168 Given that multiple independent genotypes each induce suspensor-derived  
169 embryos, we asked if the cellular basis for embryo initiation is shared among  
170 these genotypes. We therefore compared early embryogenesis in  
171 M0171>>RKD1, M0171>>*bdl* and *twin1* genotypes. M0171>>RKD4 was omitted  
172 from this analysis because it did not yield a line in which twinning was heritable  
173 (Table S1).

174 In wild type embryos, all suspensor cells are derived from the basal  
175 zygote daughter cell through a series of anticlinal divisions (Fig. 2A-D). Only the  
176 uppermost hypophysis cell (Fig. 2C) contributes to the root meristem and  
177 becomes part of the seedling (Fig. 2E). In all three transgenic (M0171>>*bdl*;  
178 M0171>>RKD1) and mutant (*twin1*) genotypes analyzed, the quiescence of the  
179 suspensor was disrupted, as expressed by excessive divisions. In M0171>>*bdl*  
180 embryos, excessive divisions were found to occur in anticlinal (“normal”), as well  
181 as periclinal and oblique planes. While additional anticlinal divisions created  
182 longer suspensors, extra periclinal divisions led to the formation of clusters of  
183 small cells (Fig. 2I). As described previously (Rademacher et al., 2012), the first  
184 periclinal suspensor cell divisions usually occurred at the early globular stage  
185 (Fig. 2F). Division defects were however also observed in the pro-embryo  
186 (Radoeva et al., 2019). No twin seedlings were observed under standard growth  
187 conditions in M0171>>*bdl* lines (Fig. 2J).

188 In contrast to the seemingly pleiotropic effect of *bdl* misexpression,  
189 M0171>>RKD1 embryos followed a more regular division pattern. Excess  
190 divisions in suspensor cells were primarily periclinal, generating ordered multi-  
191 layered suspensors, followed by the appearance of embryo-like cell clusters later  
192 during development (Fig. 2K-M). While the timing of periclinal suspensor  
193 divisions matched that observed in M0171>>*bdl* embryos, no conspicuous  
194 defects in the M0171>>RKD1 pro-embryo was detected (Fig. 2N).

195 The recessive *twin1* mutant showed excessive divisions in the suspensor,  
196 and these included both anticlinal (longer suspensors) and periclinal divisions  
197 (Fig. 2P). The *twin1* mutant pro-embryo also showed division defects (Fig. 2Q).  
198 Embryo-like structures developed in *twin1* suspensors later during development

199 (Fig. 2R), where orientation could be the same as the original embryo, or  
200 opposite (Fig. 2S and S5C), and multiple embryos could initiate from the  
201 suspensor in a seemingly independent manner (Fig. S5).

202 We next asked if the ontogeny of cell proliferation in suspensors of these  
203 three genotypes were similar. Therefore, we analyzed which suspensor cell  
204 showed the first periclinal division, as a clear sign for extra divisions. This  
205 analysis showed that first defects occurred more frequently in the top half of the  
206 suspensor in M0171>>*bdl* and M0171>>RKD1 lines, while there was no clear  
207 preferential origin of the defect in *twin1* embryos (Fig. 3). The hypophysis was  
208 excluded from this analysis because *bdl* misexpression specifically interferes  
209 with auxin-dependent root formation in this cell (Weijers et al., 2006).

210 Based on this phenotypic characterization, all three genotypes that  
211 induced suspensor-derived embryos appear to differ with respect to the position  
212 of origin in the suspensor, orientation of excessive cell divisions, development of  
213 the original pro-embryo and the viability of embryo-like structures. It therefore  
214 appears that multiple paths can lead to suspensor-derived embryogenesis.

215

#### 216 *Loss of suspensor identity during suspensor-derived embryogenesis*

217

218 Suspensor-derived embryogenesis is associated with the activation of cell  
219 division in suspensor cells, a property shared by all three genotypes tested here.  
220 However, it is unclear if the activation of cell division in the suspensor is  
221 intimately linked to reprogramming of identities. Alternatively, embryo identity  
222 may be activated at any moment after a number of cells have been generated. To  
223 address this question, we introduced markers for suspensor or embryo identity  
224 into each genotype and analyzed their expression during suspensor-derived  
225 embryogenesis.

226 We first generated a set of markers based on prior publications or on  
227 transcriptome data, and evaluated their usefulness as markers of either cell type  
228 in wild-type (Table S3). Three markers - pSUC3, pATPase and pWRKY2 -  
229 faithfully marked suspensor cells and were introduced in all backgrounds (Fig.  
230 S1 and S2). Expression of pATPase::Venus is strong in suspensor cells at least  
231 from the 4-cell stage onwards (Fig. 4A) and is retained during the globular and



232 late heart stage (Fig. 4B,C). In M0171>>*bdl* embryos, expression in suspensor  
233 cells is often lost when cells divide periclinally (Fig. 4D). However, not all cells  
234 that follow from periclinal division immediately lose pATPase::Venus expression.  
235 This result suggests that, while divisions are accompanied by loss of this  
236 suspensor marker, there is likely not to be immediate downregulation following  
237 division, or at least not preceding division. In M0171>>RKD1 embryos,  
238 pATPase::Venus expression is reduced throughout the suspensor, and very few  
239 cells express the marker at the level found in wild-type suspensors (Fig. 4G).  
240 Some residual expression of this marker is retained in suspensor cells, even  
241 when these divide periclinally (Fig. 4H). Likewise, in *twin1* suspensors, the  
242 pATPase marker is also mostly lost when cells form embryo-like structures (Fig.  
243 4K). Analysis of pSUC3 and pWRKY2 markers in M0171>>*bdl* and  
244 M0171>>RKD1 embryos showed comparable results (Fig. S2). Hence, the  
245 activation of cell divisions in all three genotypes are indeed associated with loss  
246 of suspensor markers. However, there is no immediate shutdown of marker  
247 expression upon the first periclinal division. Given that the suspensor cell cycle is  
248 approximately 15 h (Gooh et al., 2015), while the half-life of the Venus variant  
249 used here is estimated to be about 24 h (Snapp, 2009), it is well possible that  
250 Venus signal is retained in divided cells, even if there is no more transcription  
251 after division. To address this question, we quantified Venus signals in  
252 periclinally divided suspensor cells, and found these to be about half of that in  
253 non-dividing and anticlinally divided cells (Fig. S3). This suggests that expression  
254 of suspensor-specific promoters is switched off during or after periclinal  
255 division.

256

#### 257 *Division likely precedes loss of suspensor identity*

258

259 Given that periclinal division is associated with loss of suspensor marker gene  
260 expression, and with the initiation of embryo-like structures, an important  
261 question is whether the divisions are a consequence or a cause of  
262 reprogramming towards embryogenesis. In the former scenario, one would  
263 expect loss of suspensor markers before cells first divide periclinally. Since this  
264 would be difficult to infer from observing multiple embryos due to the variation

265 of fluorescence levels within and between embryos, we used a live imaging  
266 approach to establish timing of division and expression of the pATPase marker  
267 in *twin1* mutant embryos. In wild-type, embryos, occasional anticlinal divisions  
268 were observed during the observation time of 64 h (Fig. 5A), consistent with  
269 prior analysis of divisions in wild-type embryos (Gooh et al., 2015). Levels of  
270 pATPase marker fluorescence did not change noticeable either before, during or  
271 after these anticlinal divisions (Fig. 5A). We observed several periclinal divisions  
272 in *tnw1* mutant embryos (Fig. 5B, C). In these cells, we did not however detect a  
273 change in pATPase expression prior to the periclinal division. Rather, expression  
274 decreased in daughter cells after the division. In some cases, expression of the  
275 marker was re-activated in one of the daughter cells (Fig. 5C). In conclusion, the  
276 loss of suspensor marker expression occurs after, not before or during, the  
277 periclinal division, which suggests that divisions are not the consequence of  
278 reprogramming. Rather, these divisions provide the cells in which  
279 reprogramming can occur.

280

#### 281 *Activation of embryo identity in suspensor-derived embryos*

282

283 To determine when newly divided cells in the suspensor switch on an embryo  
284 program, we analyzed the expression of the pDRN::Venus marker in the three  
285 genotypes. pDRN::Venus was selected from a larger collection (Table S3) based  
286 on its specificity and early expression in the wild-type pro-embryo at the 4-cell  
287 stage (Fig. 6A). Following its activation in the apical cell(s), DRN expression  
288 persists in the apical half of the early globular embryo (Fig. 6B) and becomes  
289 restricted to the shoot apical meristem (Fig. 6C). Despite clear expression in the  
290 pro-embryo, we could not detect activation of the DRN marker in dividing cells  
291 (Fig. 6D) and proliferating cell clusters (Fig. 6E, F) of M0171>>*bdl* suspensors. It  
292 should be noted though, that DRN is a direct target of the auxin response factor  
293 MP (Cole et al., 2009), whose expression is activated in proliferating suspensor  
294 cells (Rademacher et al., 2012). It is therefore likely that *bdl* expression in the  
295 suspensor will inhibit DRN expression irrespective of whether cells acquire  
296 embryo identity.

297 In contrast, periclinal divisions in suspensors of M0171>>RKD1 embryos  
298 were accompanied by activation of DRN expression (Fig. 6G, H). In most embryos  
299 DRN expression was not seen until a small cluster of proliferating cells had been  
300 established in the suspensor (Fig. 6I). The same was observed in *twin1* embryos  
301 (Fig. 6J-L), and was confirmed in M0171>>WUS embryos (Fig. 6M-O). To address  
302 whether the cells observed after the loss of suspensor identity and before  
303 acquisition of embryo identity followed a pathway mimicking egg cell identity,  
304 expression of a reproductive expression cassette-FGR7.0 (egg cell, synergids and  
305 central cell; (Völz et al., 2013) was crossed with the *twin1* line. No expression of  
306 any of the markers could be detected during periclinal divisions and the  
307 formation of twin embryos (Fig. S4.)

308 The analysis of suspensor and embryo markers in four genotypes reveals  
309 that the process of reprogramming suspensor cells towards embryo identity is  
310 marked by periclinal cell divisions, loss of suspensor markers and gain of an  
311 embryo marker. It appears that in most cases, cell divisions and loss of  
312 suspensor identity occurs well before an embryo marker is activated. This could  
313 of course be caused by difficulties in detecting early DRN expression due to low  
314 phenotype penetrance and low expression levels. However, these observations  
315 are also consistent with a scenario where reprogramming involves three distinct  
316 processes: loss of suspensor identity, cell proliferation and gain of embryo  
317 identity.

318

319 *Direct conversion of suspensor into embryo identity?*

320

321 The analysis of the DRN marker in M0171>>RKD1, M0171>>WUS and *twn1*  
322 embryos show that embryo identity is activated in newly formed cell clusters,  
323 but it is difficult to define the timing of activation relative to divisions. This is  
324 mainly due to the limited phenotypic penetrance, which complicates detection of  
325 the earliest events. In propagating primary and secondary embryos from these  
326 three genotypes, we recovered lines that show a strongly increased phenotypic  
327 penetrance that allow to address this question.

328 Since the suspensor-derived (secondary) embryo is initiated when the  
329 original (primary) pro-embryo is at globular or heart stage (Fig. 2), it is delayed

330 and therefore smaller than the primary embryo at maturity. This causes a size  
331 difference between the larger primary and the smaller secondary seedling in  
332 *twin1*, M0171>>RKD1 and M0171>>WUS lines (Fig. 7A). We separately  
333 propagate primary and secondary seedlings from these genotypes and tested  
334 their progeny for the penetrance of twin phenotypes. Strikingly, the progeny  
335 from secondary seedlings showed much higher phenotype penetrance compared  
336 to the primary seedling-derived progeny in both M0171>>RKD1 and  
337 M0171>>WUS lines (Fig. 7A). In the secondary seedling-derived lines, triplet  
338 suspensor-derived embryos were occasionally seen, in rare instance giving rise  
339 to triplet seedlings (Fig. S5). In contrast, this difference was not observed in the  
340 *tnw1* mutant (Fig. 7A), suggesting an epigenetic component that acts on the  
341 regulation of the M0171 GAL4 driver. Nonetheless, we leveraged the increased  
342 phenotypic penetrance in secondary seedling-derived M0171>>RKD1 and  
343 M0171>>WUS embryos to help identify the earliest stages of activation of the  
344 DRN marker. Indeed, we more readily identified periclinal suspensor cell  
345 divisions and substantially earlier expression of the DRN::Venus marker. This  
346 could be observed as early as after the first periclinal division in both daughter  
347 cells (Fig. 7B, C, E, F). We re-examined the *twin1* mutant in light of this  
348 observation, which revealed that early DRN::Venus expression also occurs in this  
349 mutant (Fig. 7D). Thus, in addition to the 'late' DRN expression in cell clusters,  
350 there appears to also be a more direct conversion into embryo identity.  
351

352 **Discussion**

353

354 The occurrence of twin seedlings is a rare property in Arabidopsis, previously  
355 found only in the recessive *twin1* and *twin2* mutants (Vernon and Meinke, 1994)  
356 and upon inhibition of auxin response (Rademacher et al., 2012). Here, we  
357 explored a candidate gene approach employing suspensor-specific expression of  
358 genes known to promote somatic embryogenesis. This revealed that three genes,  
359 RKD1, RKD4 and WUS were able to induce twin seedlings. Of these, WUS and the  
360 egg-cell expressed gene RKD1 resulted in a heritable twin embryo and seedling  
361 phenotype.

362 One of the surprising findings is that transcription factors known to  
363 maintain embryo identity such as BBM (Boutilier et al., 2002), AGL15 (Harding et  
364 al., 2003), LEC (Braybrook and Harada, 2008) and members of the WOX family  
365 (Haecker et al., 2004) did not induce twins. Apart from possible transgene  
366 silencing effects, a plausible interpretation is that the activity of embryo-  
367 inducing genes is far more dependent on cellular context than anticipated.  
368 Context-dependent action has been described for genes belonging to the BBM-  
369 AGL15-LEC pathway, that appear to be more active in immature zygotic embryos  
370 than in mature seedlings (Horstman et al., 2017). Apparently, context-  
371 dependence also extends in the opposite direction to much earlier stages of  
372 embryo development as analyzed here.

373

374 The WUSCHEL gene is a homeobox-containing transcription factor that  
375 maintains the undifferentiated state of stem cells in the shoot apical meristem  
376 (Laux et al., 1996; Mayer et al., 1998). Later it was found in an activation tagging  
377 screen as an effective inducer of somatic embryos from seedling roots (Zuo et al.,  
378 2002). It is therefore remarkable that suspensor-enhanced expression of a gene  
379 promoting the undifferentiated state results in countering the normally imposed  
380 block of embryogenic potential of the suspensor cells. Remarkably, in our screen  
381 WUS is the only gene reported to promote embryogenesis out of context in root  
382 cells and also in suspensor cells. In a genome-wide analysis of genes expressed in  
383 Arabidopsis somatic embryos, compared to leaf tissue and undifferentiated  
384 callus cells, WUS was found to be upregulated in somatic embryos

385 (Wickramasuriya and Dunwell, 2015). Therefore, it appears that the cellular  
386 states underlying meristem pluripotency and embryogenesis share a common  
387 trigger.

388

389 RKD1 is a member of a small Arabidopsis gene family of RWP-RK domain-  
390 containing proteins with transcription factor activity that were originally found  
391 as genes preferentially expressed in wheat egg cells (Köszegi et al., 2011).  
392 Ectopic expression of RKD1 resulted in callus formation with egg cell  
393 characteristics. Extensive analysis of multiple mutant combinations did not  
394 provide a clear role for RKD1 in female gametogenesis (Tedeschi et al., 2017)  
395 and no evidence was provided for RKD1 functions beyond potentially  
396 maintaining egg cell identity. Loss-of-function alleles of another member of this  
397 family, RKD4, impairs zygote cell elongation and subsequent early divisions.  
398 Ectopic expression of RKD4 induces callus from which somatic embryos can  
399 form after depleting RKD4 (Waki et al., 2011). These results suggest a more  
400 general role of RKD proteins in gametophyte identity and early embryogenesis  
401 (Koi et al., 2016). We found that transient RKD1 expression in suspensor cells  
402 leads to heritable twin seedling formation. RKD4 had similar but more limited  
403 potential, as the single transgenic twin line did not show heritability of the  
404 phenotype. Given the proposed role of RKD1 in promoting egg cell identity, a  
405 plausible possibility would be that RKD1 expression caused suspensor cells to  
406 revert back to an egg cell state. This was not directly tested, but an egg cell  
407 marker was not activated during reprogramming in the *tnw1* mutant. It is  
408 therefore likely that RKD1 expression does not simply trigger egg cell identity in  
409 suspensor cells, and that its activity is also context-dependent.

410 It is intriguing that the only two genes that could efficiently convert  
411 suspensor cells into embryogenic are those that appear to have a role in  
412 promoting an undifferentiated state in either the shoot meristem cells or in the  
413 egg cell.

414

415 A key event in induction of somatic embryos in plant tissue culture is an event  
416 that has long been considered dedifferentiation. Since it is unlikely that cells  
417 entirely lose all aspects of their original identity, this event is perhaps better

418 viewed as reprogramming. What follows is a mass of rapidly dividing cells  
419 (Fehér, 2019). Such cells exhibit a callus-like transcriptome (Che et al., 2006; Xu  
420 et al., 2012) and transcription factors such as WIND (Iwase et al., 2011) have  
421 been identified that promote subsequent steps in regeneration (Iwase et al.,  
422 2015). Few studies have addressed the question whether reprogramming  
423 followed by the acquisition of a new cell fate such as ‘embryogenic’ first requires  
424 erasure of the previous somatic cell fate. Our results show that upon initiating  
425 periclinal cell division in suspensors, suspensor marker gene activity was  
426 generally reduced or totally absent. In the context of suspensor reprogramming,  
427 loss of existing cell identity is therefore indeed the first sign of cellular fate  
428 change. Propagating suspensor-derived RKD1 or WUS seedlings to later  
429 generations resulted in lines that showed increased penetrance of the twin  
430 seedling phenotype. Clearly, this suggests the existence of an epigenetic  
431 component involved in the fate conversion of suspensor cells into embryogenic  
432 cells. It should be noted that this effect was observed in M0171>>RKD1 and  
433 M0171>>WUS lines, but not *twi1*. The insertion site of the transgene in the  
434 M0171 could not be identified (Radoeva et al., 2016), and may reside in a  
435 genomic area with repeats or high GC content, perhaps sensitive to epigenetic  
436 phenomena. On the other hand, it is also possible that the process of  
437 reprogramming itself involves epigenetic components. Indeed, explants derived  
438 from somatic embryos often exhibit an increased frequency of embryogenic cell  
439 formation compared to original explants (reviewed in Méndez-Hernández et al.,  
440 2019). Whether a link exists between this phenomenon and the recently  
441 discovered role of chromatin remodeling in embryogenic cell formation  
442 (reviewed in De-la-Peña et al., 2015; Guo et al., 2020) remains to be determined.  
443 In *twi1* and in the high-penetrance RKD1 and WUS lines, DRN expression was  
444 activated almost immediately upon suspensor cell division, suggesting a direct  
445 conversion of suspensor cell into embryo fate. What this result shows is that  
446 reprogramming can, but must not, involve an intervening period of cell  
447 proliferation. Based on the similarities described above, we propose that  
448 suspensor-derived embryogenesis is closely related to the classical process of  
449 somatic embryogenesis.  
450

451

452

453

454

455 **Acknowledgements**

456

457 The authors would like to thank Rita Gross-Hardt for sharing the reproductive  
458 cell marker FGR7.0, David Meinke for the *twin1* mutant, Thijs de Zeeuw for  
459 advice on live imaging and Naomi Weertman for experimental support. This  
460 work was supported by the Netherlands Organization for Scientific Research  
461 (NWO; ALW-NSFC Grant 846.11.001 to D.W.).

462

463



## 464 **Materials and Methods**

465

### 466 *Plant material and growth conditions*

467 The M0171 GAL4/GFP enhancer trap line was generated by Dr. Jim Haseloff in  
468 the C24 ecotype (Haseloff, 1999) and was obtained through the Nottingham  
469 Arabidopsis Stock Center (NASC). All transcriptional Venus fusion lines and the  
470 pUAS-gene fusion lines were generated in Columbia-0 (Col-0) ecotype.

471 Seeds were surface sterilized in 25% bleach/75% ethanol solution for 10  
472 minutes and were afterwards washed twice with 70% ethanol and once with  
473 100% ethanol. Dried seeds were subsequently plated on half-strength Murashige  
474 and Skoog (MS) medium and the appropriate antibiotic (50 mg/l Kanamycin, 15  
475 mg/l Phosphinothricin or 0.1 mg/l Methotrexate) for selection of transgenic  
476 seeds. After 24 hours incubation at 4°C, the plants were cultured under long-day  
477 (16h light, 8h dark) conditions at 22°C.

478

### 479 *Cloning*

480 All cloning was carried out using the Ligation Independent Cloning (LIC) system  
481 and the vectors used are previously described (de Rybel et al., 2011; Wendrich et  
482 al., 2015). For generating the pUAS-fusion lines for M0171-drive misexpression,  
483 genomic fragments spanning the entire coding sequences were amplified from  
484 genomic DNA using Phusion Flash PCR Master Mix (Thermo Scientific) and  
485 cloned into vector pPLV132. To generate the transcriptional fusions, up to 3kb  
486 fragments upstream of the ATG were amplified from genomic DNA. After  
487 sequencing, the constructs were transformed into M0171>>RKD1, UAS-*bdl*,  
488 *twin1* and M0171>>WUS lines by floral dipping (de Rybel et al., 2011). All  
489 primers used for cloning can be found in Table S4.

490

### 491 *Microscopy and sample preparation*

492 Differential Interference Contrast (DIC) and confocal microscopy were carried  
493 out as previously described (Llavata-Peris et al., 2013) with minor modifications.  
494 For DIC imaging, ovules were isolated in chloral hydrate solution (chloral  
495 hydrate, water and glycerol, 8:3:1 w/v/v). After short incubation, the embryos  
496 were observed on a Leica DMR microscope equipped with DIC optics. For

497 confocal imaging, ovules were isolated in 1x phosphate solution saline (PBS)  
498 containing 4% paraformaldehyde, 5% glycerol and 0.1% SCRI Renaissance Stain  
499 2200 (R2200; Renaissance Chemicals, UK) for counterstaining of embryos. The  
500 embryos were taken out of the ovules by gently pressing the coverslip of slides  
501 containing ovules. R2200 and Venus fluorescence were visualized by excitation  
502 at 405 nm and 514 nm and detection between 430-470 nm and 524-540 nm,  
503 respectively. Confocal imaging was performed on a Leica SP5 II system equipped  
504 with Hybrid detectors (HyD).

505

#### 506 *Live embryo imaging*

507 For live imaging, the procedures described by (Gooh et al., 2015) were employed  
508 with a number of modifications. M0171>>*bdl*, M0171>>RKD1 and *twin1* lines  
509 showing a high penetrance of the twin seedling phenotype and that also  
510 expressed pATPase::Venus markers were selected. Approximately 50-80 ovules  
511 were isolated and incubated on 300  $\mu$ m polydimethylsiloxane (PDMS) microcage  
512 arrays, modified by cutting a small channel in the device to allow better exchange  
513 with the surrounding Nitsch medium supplemented with 5% w/v trehalose  
514 (Gooh et al., 2015). This resulted in ovules remaining alive and growing up to  
515 300 h. Suspensor markers remained visible for at least 110 h of culture time  
516 using an hourly schedule of illumination.

517 Live embryo tracking was done on a Leica SP8 with an inverted table controlled  
518 by the LAS AF and LAS X programs. A 20x water objective using 20% glycerol to  
519 prevent evaporation during long acquisition times was used. To visualize Venus  
520 fluorescence, excitation was done at 514 nm, 20% laser power and acquisition  
521 between 535 and 570 nm. After manually pinpointing ovule positions, the  
522 program collected 10 z-stack images at 10  $\mu$ m spacing with the most intense  
523 image at the center, recorded every hour and about 20 ovules per microcage.  
524 Image data were optimized to obtain z-projections that were mounted in  
525 sequence. All projections were evaluated for the occurrence of anticlinal (wild  
526 type) and periclinal (mutant or transgene) suspensor cell divisions. Quality of  
527 fluorescent images was scored using an ad hoc scaling system between 0 and 4.

528

529

530 **Figure legends**

531

532 **Figure 1: Suspensor division, twin embryo and seedling phenotypes.**

533 Frequency of suspensor periclinal divisions compared to twin embryo and  
534 seedling formation in M0171>>RKD1 and *tnw1* lines.

535

536 **Figure 2: Twin embryo and seedling development**

537 Wild type embryo (A-D) and seedling (E) phenotype, M0171>>*bdl* embryo (F-I)  
538 and seedling (J) phenotype, M0171>>RKD1 embryo (K-N) and seedling (O)  
539 phenotype, *tnw1* embryo (P-S) and seedling (T) phenotype. Embryo images were  
540 made from cleared ovules, seedling images by light microscopy. The embryo  
541 images in F, K and P were taken at the moment the first periclinal division  
542 (arrowhead) was detected. Scale bar represents 10  $\mu$ m in all panels. Arrowheads  
543 point to periclinal divisions, arrowhead in J points to root mutant phenotype,  
544 arrows in O and T to secondary twin embryo.

545

546 **Figure 3: Distribution of periclinal divisions in suspensor cells.**

547 Bar diagram of the number of first periclinal divisions observed in M0171>>*bdl*,  
548 M0171>>RKD1 and *tnw1* suspensors. Bar marked H represents the hypophyseal  
549 cell. No periclinal divisions were seen in a comparable number of wild-type  
550 embryos.

551

552 **Figure 4: Loss of suspensor marker expression after periclinal suspensor  
553 cell divisions.**

554 Expression of the pATPase::Venus suspensor marker in wild-type (A-C),  
555 M0171>>*bdl* (D-F), M0171>>RKD1 (G-I) and *tnw1* embryos (J-L). All embryos  
556 were released from developing seeds and imaged by confocal microscopy. Scale  
557 bar represents 10  $\mu$ m in all panels.

558

559 **Figure 5: Live imaging of suspensor marker expression in *tnw1*.**

560 Time-lapse recordings of pATPase::Venus expression in wild-type (A), and in two  
561 representatives of *tnw1* (B,C). Up to approximately 45-50 h of recording no loss  
562 of pATPase::Venus signal intensity was observed in wild type embryos.

563

564 **Figure 6: Activation of embryo marker expression in suspensor-derived**  
565 **embryos.**

566 Expression of the pDRN::Venus pro-embryo marker in wild-type (A-C),  
567 M0171>>*bdl* (D-F), M0171>>RKD1 (G-I) and *twi1* embryos (J-L). All embryos  
568 were released from developing seeds and imaged by confocal microscopy. Scale  
569 bar represents 10  $\mu$ m in all panels.

570

571 **Figure 7. Early embryo fate conversion in high-penetrance lines**

572 Three rounds of selfing using *twi1*, M0171>>RKD1 and M0171>>WUS,  
573 expressing the pDRN::Venus marker produced a collection of lines that derived  
574 from the zygotic or the suspensor-derived twin embryo. Between 7 and 16 lines  
575 (over 1300 embryos in total) per transgene were analysed for the indicated  
576 penetrance of the twin embryo phenotype (A). Early pDRN::Venus expression  
577 was recorded in wt embryos (B), the third generation of twin suspensor embryo  
578 derived lines of M0171>>RKD1 (C, D) *twi1*(E) and M0171>>WUS (F, G). All  
579 embryos were released from developing seeds and imaged by confocal  
580 microscopy. Scale bar represents 10  $\mu$ m in all panels. Arrowheads indicate single  
581 suspensor cells that express the pro-embryo marker pDRN::Venus.

582

583

584 **References**

585

586 Boutilier, K., Offringa, R., Sharma, V.K., Kieft, H., Ouellet, T., Zhang, L., Hattori, J.,  
587 Liu, C.M., Van Lammeren, A.A.M., Miki, B.L.A. and Custers, J.B., van Lookeren  
588 Campagne, M.M. (2002). Ectopic expression of BABY BOOM triggers a  
589 conversion from vegetative to embryonic growth. *Plant Cell*. 14, 1737-1749.  
590 doi: 10.1105/tpc.001941.

591 Braybrook, S.A., and Harada, J.J. (2008). LECs go crazy in embryo development.  
592 *Trends Plant Sci*. 13, 624-630. doi: 10.1016/j.tplants.2008.09.008.

593 Che, P., Lall, S., Nettleton, D., and Howell, S.H. (2006). Gene expression programs  
594 during shoot, root, and callus development in Arabidopsis tissue culture. *Plant*  
595 *Physiol*. 141, 620-637. doi: 10.1104/pp.106.081240.

596 Cole, M., Chandler, J., Weijers, D., Jacobs, B., Comelli, P., and Werr, W. (2009).  
597 DORNROSCHE is a direct target of the auxin response factor MONOPTEROS  
598 in the Arabidopsis embryo. *Development*. 136, 1643-1651. doi:  
599 10.1242/dev.032177.

600 De-la-Peña, C., Nic-Can, G.I., Galaz-Ávalos, R.M., Avilez-Montalvo, R., and Loyola-  
601 Vargas, V.M. (2015). The role of chromatin modifications in somatic  
602 embryogenesis in plants. *Front. Plant Sci*. 18, 6:635. doi:  
603 10.3389/fpls.2015.00635.

604 Egertsdotter, U., Ahmad, I., and Clapham, D. (2019). Automation and scale up of  
605 somatic embryogenesis for commercial plant production, with emphasis on  
606 conifers. *Front. Plant Sci*. 10, 109. doi: 10.3389/fpls.2019.00109.

607 Fehér, A. (2019). Callus, dedifferentiation, totipotency, somatic embryogenesis:  
608 What these terms mean in the era of molecular plant biology? *Front. Plant*  
609 *Sci*. 10, 536. doi: 10.3389/fpls.2019.00536.

610 Gooh, K., Ueda, M., Aruga, K., Park, J., Arata, H., Higashiyama, T., and Kurihara, D.  
611 (2015). Live-Cell Imaging and Optical Manipulation of Arabidopsis Early  
612 Embryogenesis. *Dev. Cell*. 34, 242-251. doi: 10.1016/j.devcel.2015.06.008.

613 Guo, H., Fan, Y., Guo, H., Wu, J., Yu, X., Wei, J., Lian, X., Zhang, L., Gou, Z., Fan, Y., et  
614 al. (2020). Somatic embryogenesis critical initiation stage-specific mCHH  
615 hypomethylation reveals epigenetic basis underlying embryogenic  
616 redifferentiation in cotton. *Plant Biotechnol. J*. doi: 10.1111/pbi.13336.

- 617 Haccius, B. (1955). Experimentally Induced Twinning in Plants. *Nature*. 176,  
618 355–356. doi: 10.1038/176355a0.
- 619 Haecker, A., Groß-Hardt, R., Geiges, B., Sarkar, A., Breuninger, H., Herrmann, M.,  
620 and Laux, T. (2004). Expression dynamics of WOX genes mark cell fate  
621 decisions during early embryonic patterning in *Arabidopsis thaliana*.  
622 *Development*. 131, 657-668. doi: 10.1242/dev.00963.
- 623 Harding, E.W., Tang, W., Nichols, K.W., Fernandez, D.E., and Perry, S.E. (2003).  
624 Expression and Maintenance of Embryogenic Potential Is Enhanced through  
625 Constitutive Expression of AGAMOUS-Like 15. *Plant Physiol*. 133, 653-663.  
626 doi: 10.1104/pp.103.023499.
- 627 Haseloff, J. (1999). GFP variants for multispectral imaging of living cells. *Methods*  
628 *Cell Biol*. 58, 139-151. doi: 10.1016/s0091-679x(08)61953-6.
- 629 Hecht, V., Vielle-Calzada, J.P., Hartog, M. V., Schmidt, E.D.L., Boutilier, K.,  
630 Grossniklaus, U., and De Vries, S.C. (2001). The arabidopsis SOMATIC  
631 EMBRYOGENESIS RECEPTOR KINASE 1 gene is expressed in developing  
632 ovules and embryos and enhances embryogenic competence in culture. *Plant*  
633 *Physiol*. 127, 803-816. doi: 10.1104/pp.010324.
- 634 Horstman, A., Li, M., Heidmann, I., Weemen, M., Chen, B., Muino, J.M., Angenent,  
635 G.C., and Boutilier, K. (2017). The BABY BOOM transcription factor activates  
636 the LEC1-ABI3-FUS3-LEC2 network to induce somatic embryogenesis. *Plant*  
637 *Physiol*. 175, 848-857. doi: 10.1104/pp.17.00232.
- 638 Ikeuchi, M., Sugimoto, K., and Iwase, A. (2013). Plant callus: Mechanisms of  
639 induction and repression. *Plant Cell*. 25, 3159-3173. doi:  
640 10.1105/tpc.113.116053.
- 641 Iwase, A., Mitsuda, N., Koyama, T., Hiratsu, K., Kojima, M., Arai, T., Inoue, Y., Seki,  
642 M., Sakakibara, H., Sugimoto, K., et al. (2011). The AP2/ERF transcription  
643 factor WIND1 controls cell dedifferentiation in arabidopsis. *Curr. Biol*. 21,  
644 508-514. doi: 10.1016/j.cub.2011.02.020.
- 645 Iwase, A., Mita, K., Nonaka, S., Ikeuchi, M., Koizuka, C., Ohnuma, M., Ezura, H.,  
646 Imamura, J., and Sugimoto, K. (2015). WIND1-based acquisition of  
647 regeneration competency in *Arabidopsis* and rapeseed. *J. Plant Res*. 128, 389-  
648 397. doi: 10.1007/s10265-015-0714-y.
- 649 Kawashima, T., and Goldberg, R.B. (2010). The suspensor: not just suspending

- 650 the embryo. *Trends Plant Sci.* 15, 23-30. doi: 10.1016/j.tplants.2009.11.002.
- 651 Koi, S., Hisanaga, T., Sato, K., Ishizaki, K., Kohchi, T., Nakajima, K., Shimamura, M.,  
652 and Yamato, K.T. (2016). An Evolutionarily Conserved Plant RKD Factor  
653 Controls Germ Cell Differentiation. *Curr. Biol.* 26, 1775-1781. doi:  
654 10.1016/j.cub.2016.05.013.
- 655 Köszegi, D., Johnston, A.J., Rutten, T., Czihal, A., Altschmied, L., Kumlehn, J., Wüst,  
656 S.E.J., Kirioukhova, O., Gheyselinck, J., Grossniklaus, U., et al. (2011). Members  
657 of the RKD transcription factor family induce an egg cell-like gene expression  
658 program. *Plant J.* 67, 280-291. doi: 10.1111/j.1365-313X.2011.04592.x
- 659 Lakshmanan, K.K., and Ambegaokar, K.B. (1984). Polyembryony. In *Embryology*  
660 *of Angiosperms*. 445-474. doi: 10.1007/978-3-642-69302-1\_9.
- 661 Laux, T., Mayer, K.F.X., Berger, J., and Jürgens, G. (1996). The WUSCHEL gene is  
662 required for shoot and floral meristem integrity in Arabidopsis.  
663 *Development.* 122, 87-96.
- 664 Liu, Y., Li, X., Zhao, J., Tang, X., Tian, S., Chen, J., Shi, C., Wang, W., and Zhang, L.  
665 (2015). Direct evidence that suspensor cells have embryogenic potential that  
666 is suppressed by the embryo proper during normal embryogenesis. *Proc.*  
667 *Natl. Acad. Sci. USA.* 112, 12432-12437. doi: 10.1073/pnas.1508651112.
- 668 Llavata-Peris, C., Lokerse, A., Möller, B., De Rybel, B., and Weijers, D. (2013).  
669 Imaging of phenotypes, gene expression, and protein localization during  
670 embryonic root formation in arabidopsis. *Methods Mol. Biol.* 959, 137-148.  
671 doi: 10.1007/978-1-62703-221-6\_8.
- 672 Mayer, K.F.X., Schoof, H., Haecker, A., Lenhard, M., Jürgens, G., and Laux, T.  
673 (1998). Role of WUSCHEL in regulating stem cell fate in the Arabidopsis  
674 shoot meristem. *Cell.* 95, 805-815. doi: 10.1016/S0092-8674(00)81703-1.
- 675 Méndez-Hernández, H.A., Ledezma-Rodríguez, M., Avilez-Montalvo, R.N., Juárez-  
676 Gómez, Y.L., Skeete, A., Avilez-Montalvo, J., De-La-Peña, C., and Loyola-  
677 Vargas, V.M. (2019). Signaling overview of plant somatic embryogenesis.  
678 *Front. Plant Sci.* 10:77. doi: 10.3389/fpls.2019.00077.
- 679 Palovaara, J., de Zeeuw, T., and Weijers, D. (2016). Tissue and Organ Initiation in  
680 the Plant Embryo: A First Time for Everything. *Annu. Rev. Cell Dev. Biol.* 32,  
681 47-75. doi: 10.1146/annurev-cellbio-111315-124929.
- 682 Rademacher, E.H., Lokerse, A.S., Schlereth, A., Llavata-Peris, C.I., Bayer, M., Kientz,

- 683 M., FreireRios, A., Borst, J.W., Lukowitz, W., Jürgens, G., et al. (2012). Different  
684 Auxin Response Machineries Control Distinct Cell Fates in the Early Plant  
685 Embryo. *Dev. Cell.* 22, 211-222. doi: 10.1016/j.devcel.2011.10.026.
- 686 Radoeva, T., and Weijers, D. (2014). A roadmap to embryo identity in plants.  
687 *Trends Plant Sci.* 19, 709-716. doi: 10.1016/j.tplants.2014.06.009.
- 688 Radoeva, T., Hove, C.A.T., Saiga, S., and Weijers, D. (2016). Molecular  
689 characterization of arabidopsis GAL4/UAS enhancer trap lines identifies  
690 novel cell-type-specific promoters. *Plant Physiol.* 171, 1169-1181. doi:  
691 10.1104/pp.16.00213.
- 692 Radoeva, T., Lokerse, A.S., Llavata-Peris, C.I., Wendrich, J.R., Xiang, D., Liao, C.Y.,  
693 Vlaar, L., Boekschoten, M., Hooiveld, G., Datla, R., et al. (2019). A robust auxin  
694 response network controls embryo and suspensor development through a  
695 basic helix loop helix transcriptional module. *Plant Cell* 31, 52-67. doi:  
696 10.1105/tpc.18.00518.
- 697 de Rybel, B.D., van Den Berg, W., Lokerse, A., Liao, C.Y., Van Mourik, H., Möller, B.,  
698 Peris, C.L., and Weijers, D. (2011). A versatile set of ligation-independent  
699 cloning vectors for functional studies in plants. *Plant Physiol.* 156, 1292-  
700 1299. doi: 10.1016/j.tplants.2014.06.009.
- 701 Schwartz, B.W., Yeung, E.C., and Meinke, D.W. (1994). Disruption of  
702 morphogenesis and transformation of the suspensor in abnormal suspensor  
703 mutants of Arabidopsis. *Development.* 120, 3235-3245.
- 704 Snapp, E.L. (2009). Fluorescent proteins: a cell biologist's user guide. *Trends Cell*  
705 *Biol.* 19, 649-655. doi: 10.1016/j.tcb.2009.08.002
- 706 Tedeschi, F., Rizzo, P., Rutten, T., Altschmied, L., and Bäumlein, H. (2017). RWP-  
707 RK domain-containing transcription factors control cell differentiation  
708 during female gametophyte development in Arabidopsis. *New Phytol.* 213,  
709 1909-1924. doi: 10.1111/nph.14293.
- 710 Vernon, D.M., and Meinke, D.W. (1994). Embryogenic Transformation of the  
711 Suspensor in twin, a Polyembryonic Mutant of Arabidopsis. *Dev. Biol.* 165,  
712 566-573. doi: <https://doi.org/10.1006/dbio.1994.1276>.
- 713 Völz, R., Heydlauff, J., Ripper, D., vonLyncker, L., and Groß-Hardt, R. (2013).  
714 Ethylene Signaling Is Required for Synergid Degeneration and the  
715 Establishment of a Pollen Tube Block. *Dev. Cell.* 25, 3210-316. doi:



716        10.1016/j.devcel.2013.04.001.  
717    de Vries, S.C., and Weijers, D. (2017). Plant embryogenesis. *Curr. Biol.* 27, 870-  
718        873. doi: 10.1016/j.cub.2017.05.026.  
719    Waki, T., Hiki, T., Watanabe, R., Hashimoto, T., and Nakajima, K. (2011). The  
720        arabidopsis RWP-RK protein RKD4 triggers gene expression and pattern  
721        formation in early embryogenesis. *Curr. Biol.* 21, 1277-1281. doi:  
722        10.1016/j.cub.2011.07.001.  
723    Weijers, D., vanHamburg, J.P., vanRijn, E., Hooykaas, P.J.J., and Offringa, R. (2003).  
724        Diphtheria toxin-mediated interregional communication seed development.  
725        *Plant Physiol.* 133, 1882-1892. doi: 10.1104/pp.103.030692.2003.  
726    Weijers, D., Schlereth, A., Ehrismann, J.S., Schwank, G., Kientz, M., and Jürgens, G.  
727        (2006). Auxin triggers transient local signaling for cell specification in  
728        Arabidopsis embryogenesis. *Dev. Cell.* 10, 265-270. doi:  
729        10.1016/j.devcel.2005.12.001.  
730    Wendrich, J.R., Möller, B.K., Uddin, B., Radoeva, T., Lokerse, A.S., De Rybel, B., and  
731        Weijers, D. (2015). A set of domain-specific markers in the Arabidopsis  
732        embryo. *Plant Reprod.* 28, 153-160. doi: 10.1007/s00497-015-0266-2.  
733    Wickramasuriya, A.M., and Dunwell, J.M. (2015). Global scale transcriptome  
734        analysis of Arabidopsis embryogenesis in vitro. *BMC Genomics.* 16:301. doi:  
735        10.1186/s12864-015-1504-6.  
736    Xu, K., Liu, J., Fan, M., Xin, W., Hu, Y., and Xu, C. (2012). A genome-wide  
737        transcriptome profiling reveals the early molecular events during callus  
738        initiation in Arabidopsis multiple organs. *Genomics.* 100, 116-124. doi:  
739        10.1016/j.ygeno.2012.05.013.  
740    Zuo, J., Niu, Q.W., Frugis, G., and Chua, N.H. (2002). The WUSCHEL gene promotes  
741        vegetative-to-embryonic transition in Arabidopsis. *Plant J.* 30, 349-359. doi:  
742        10.1046/j.1365-313X.2002.01289.x.  
743

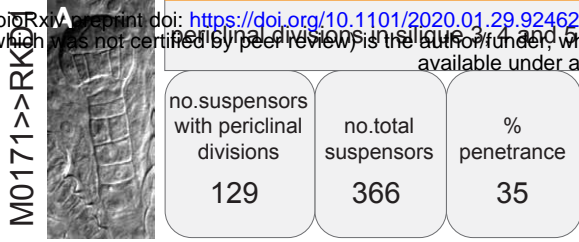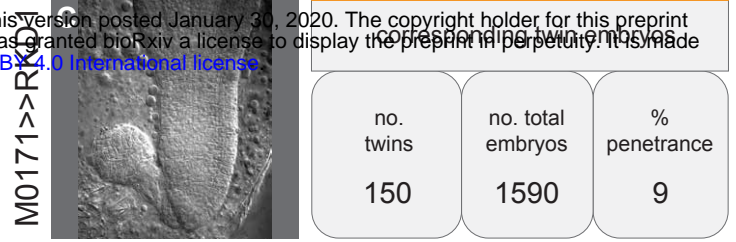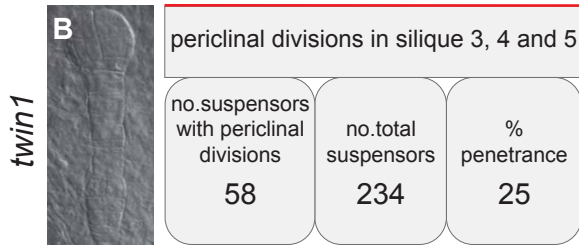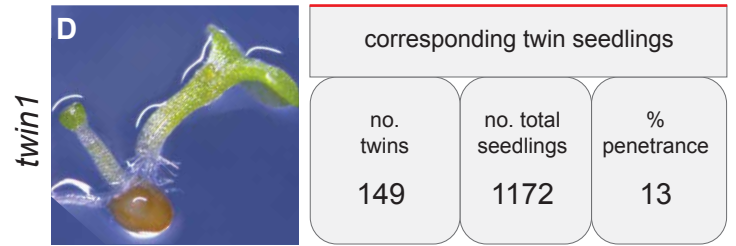

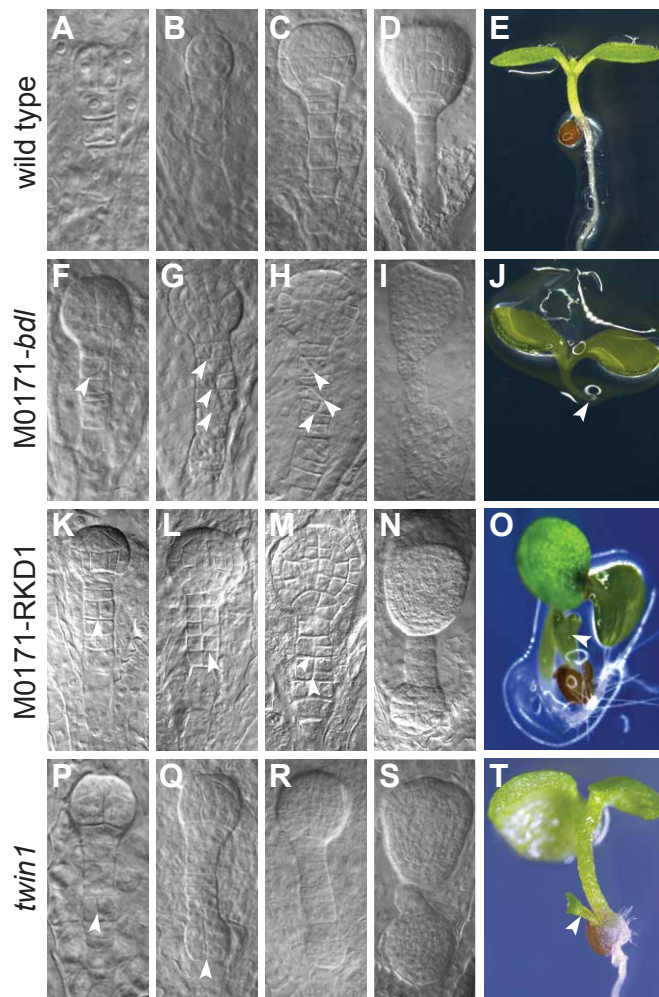

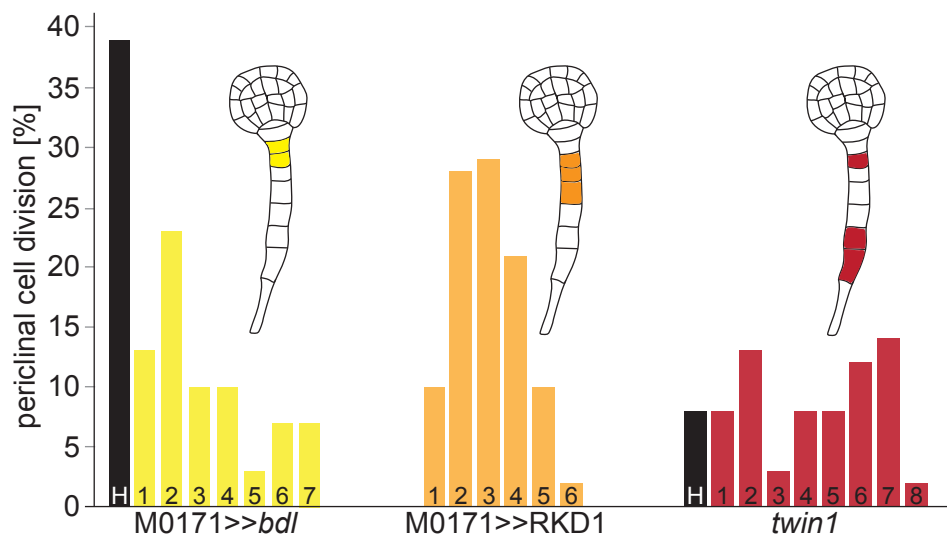

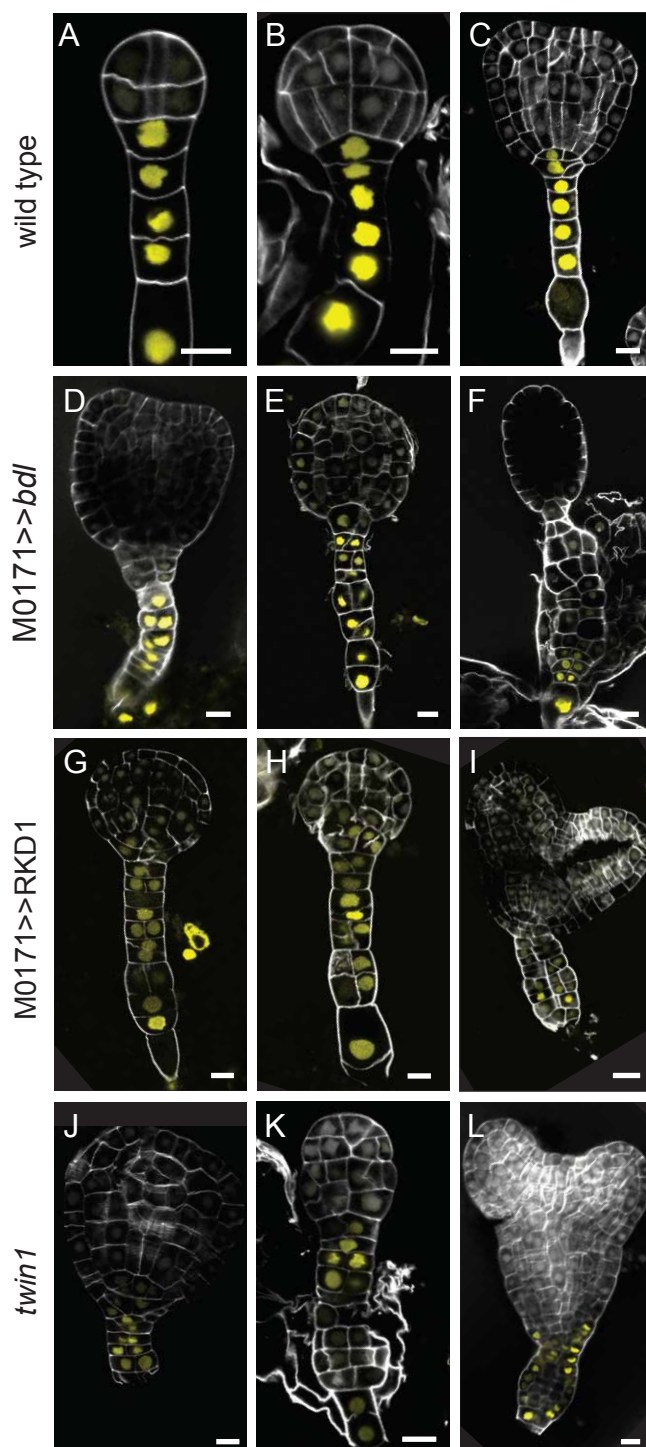

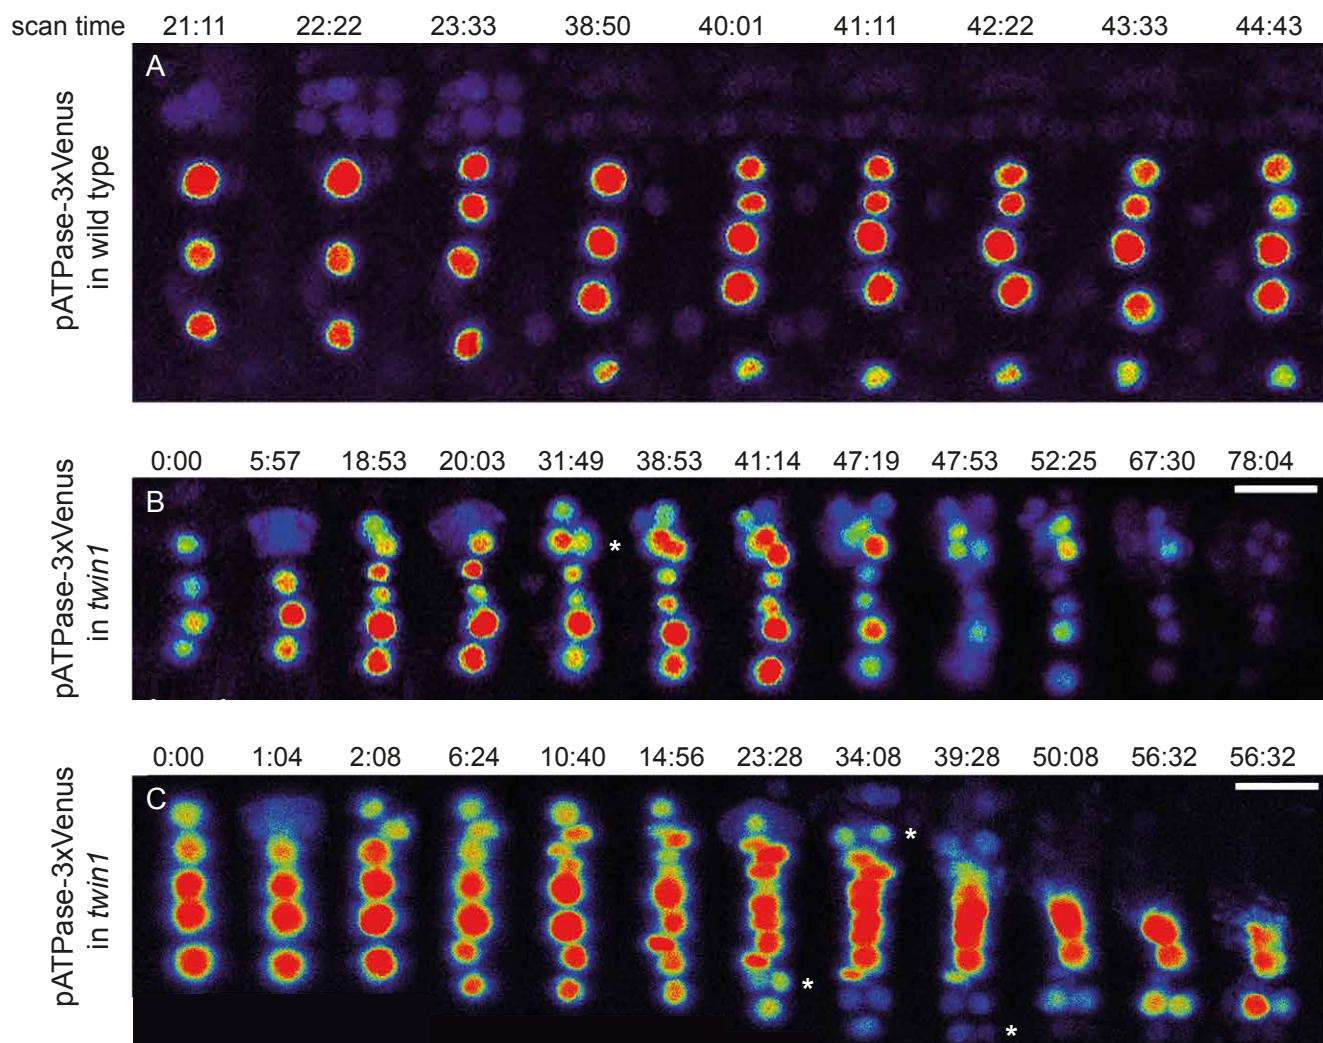



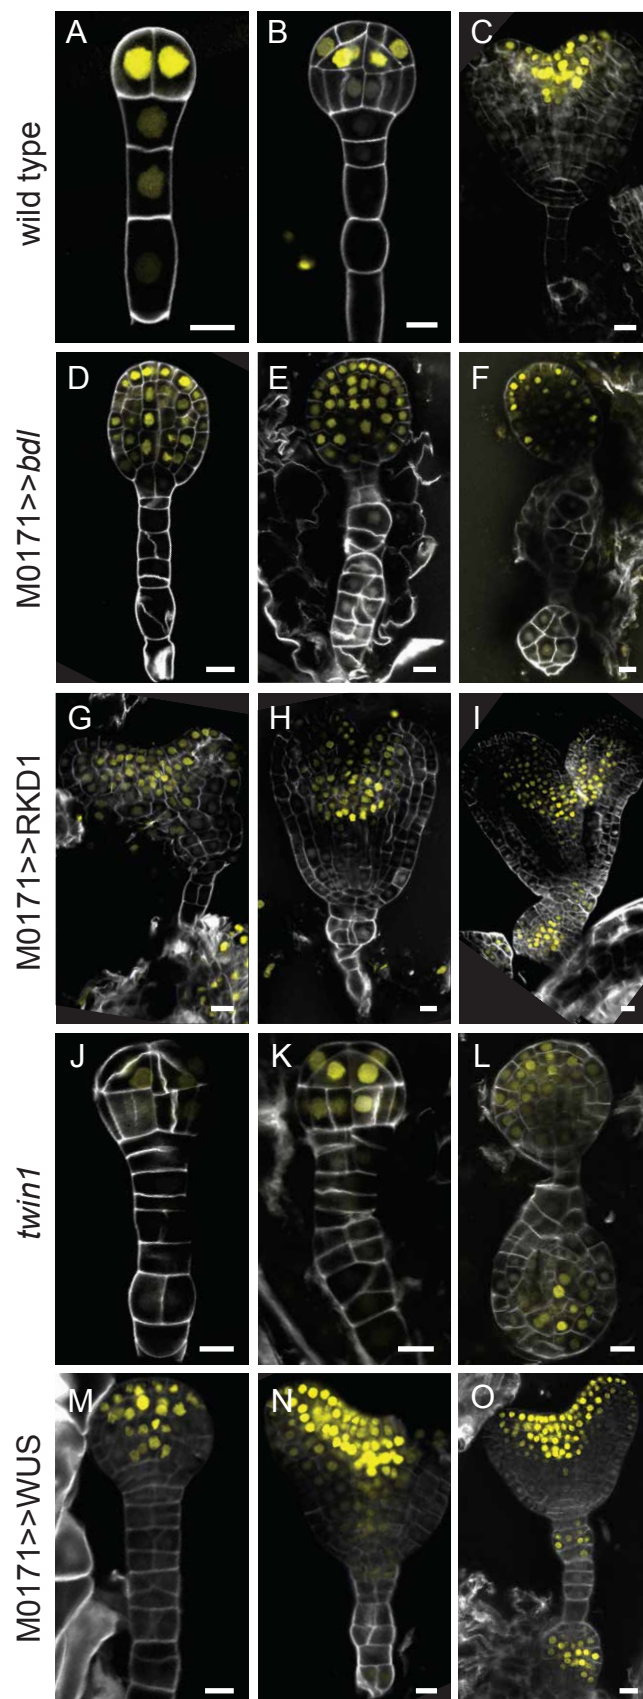

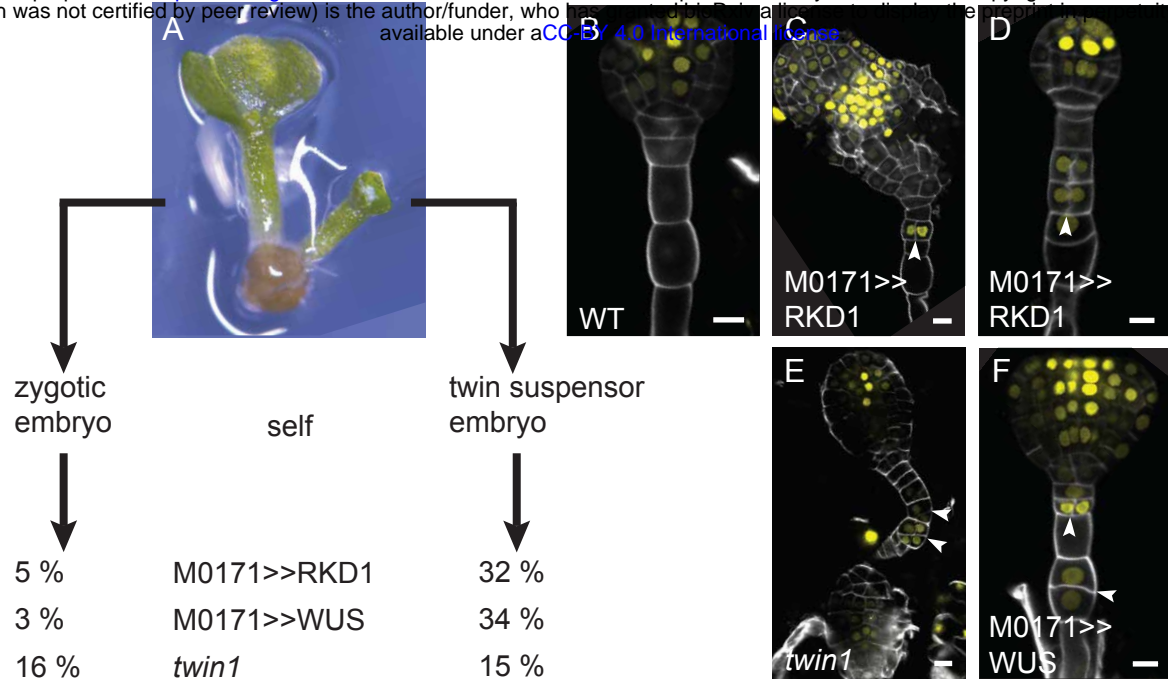

Source: https://www.biorxiv.org/content/10.1101/2020.01.29.924621v1.full.pdf
